# Supplementary material for: Inhibiting EMT, stemness and cell cycle involved in baicalin-induced growth inhibition and apoptosis in colorectal cancer cells
Source: PubMed Central journal article supplement (PMC7052934; doi:10.7150/jca.37242), 2020-02-10
Supplement: jcav11p2303s1.pdf [file jcav11p2303s1.pdf]

Fig. S1

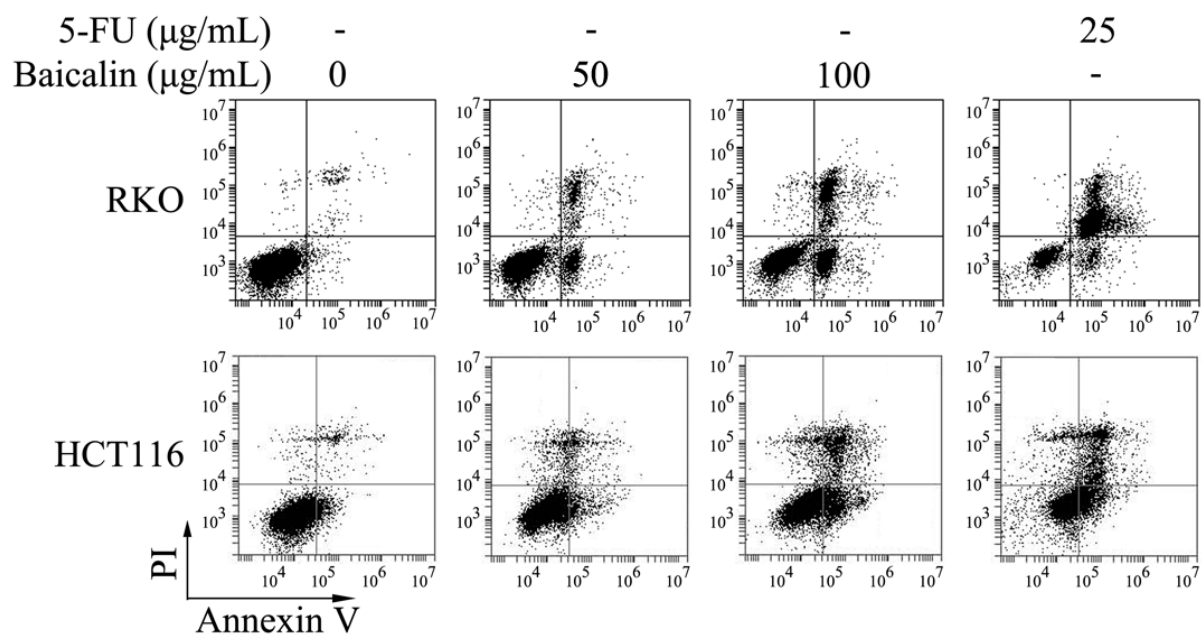

**Figure S1.** RKO and HCT116 cells which treated with 0, 50 and 100  $\mu\text{g/mL}$  of baicalin and 25  $\mu\text{g/mL}$  of 5-FU for 48 h were assayed for apoptosis by flow cytometry with Annexin V / propidium iodide double-staining. The apoptotic cells increased with increase of treated concentration of baicalin. The positive control was the cells treated with 25  $\mu\text{g/mL}$  of 5-FU.
